# Supplementary material
Source: PubMed Central journal article supplement (PMC7667722)
Supplement: NIHMS1546555-supplement-Supplementary_Tables.pdf [file NIHMS1546555-supplement-Supplementary_Tables.pdf]

Supplementary Table 1.

| Antibody    | Clone     | Final concentration | Conjugate | Company                         |
|-------------|-----------|---------------------|-----------|---------------------------------|
| CD45        | 30-F11    | 1:500               | APC Cy7   | BD Pharmigen<br>Cat# 557659     |
| F4/80       | BM8       | 1:100               | PE        | BioLegend<br>Cat# 123110        |
| CD11c       | N418      | 1:500               | BV605     | BioLegend<br>Cat#117333         |
| CD11b       | M1/70     | 1:2000              | v450      | BD<br>Biosciences<br>Cat#580456 |
| CD64        | X54-5/7.1 | 1:200               | PE Cy7    | BioLegend<br>Cat#139314         |
| Ly6c        | HK1.4     | 1:1000              | AF700     | BioLegend<br>Cat#128023         |
| Ly6g        | 1A8       | 1:400               | FITC      | BioLegend<br>Cat#127605         |
| SiglecF     | E50-2440  | 1:100               | AF647     | BD<br>Biosciences<br>Cat#582880 |
| Zombie Aqua | N/A       | 1:500               | N/A       | BioLegend<br>Cat#423101         |

|         |    |        |     |                         |
|---------|----|--------|-----|-------------------------|
|         |    |        |     |                         |
| CD16/32 | 93 | 1:1000 | N/A | BioLegend<br>Cat#101302 |

Supplementary Table 2.

| Antibody                  | Clone   | Final concentration | Conjugate | Company                     |
|---------------------------|---------|---------------------|-----------|-----------------------------|
| CD45                      | 30-F11  | 1:500               | APC Cy7   | BD Pharmigen<br>Cat# 557659 |
| TCR $\beta$ chain         | H57-597 | 1:500               | AF647     | BioLegend<br>Cat#109217     |
| CD19                      | 6D5     | 1:500               | AF647     | BioLegend<br>Cat#115525     |
| TCR $\gamma/\delta$ chain | G1.3    | 1:500               | PE Cy7    | BioLegend<br>Cat#118123     |
| Zombie Aqua               | N/A     | 1:500               | N/A       | BioLegend<br>Cat#423101     |
| CD16/32                   | 93      | 1:1000              | N/A       | BioLegend<br>Cat#101302     |
